# Supplementary material for: Computational study of catalyst-controlled regiodivergent pathways in hydroboration of 1,3-dienes: mechanism and origin of regioselectivity
Source: Royal Society of Chemistry journal article supplement (doi:10.1039/d0qo00479k), 2020-01-01
Supplement: d0qo00479k1.pdf [file d0qo00479k1.pdf]

## *Supporting Information*

### **Computational Study of Catalyst-Controlled Regiodivergent Pathways in Hydroboration of 1,3-Dienes: Mechanism and Origin of Regioselectivity**

Zhongxin Fu<sup>#</sup>, Xianming Guo<sup>#</sup>, Yupan Li and Juan Li\*

Department of Chemistry, Jinan University, Huangpu Road West 601, Guangzhou,  
Guangdong 510632, P. R. China

\*Corresponding authors. Email: tchjli@jnu.edu.cn (J. Li)

<sup>#</sup> These authors contributed equally.

---

#### **Table of Contents**

---

|                   |                                                                   |         |
|-------------------|-------------------------------------------------------------------|---------|
| <b>Section 1.</b> | Other possible pathways (Figs. S1-S7)                             | S2-S7   |
| <b>Section 2.</b> | Energies (in Hartree) for all TS and intermediates                | S7-S11  |
| <b>Section 3.</b> | Calculated imaginary frequencies of all transition states species | S11-S13 |

---

## Section 1. Other possible pathways

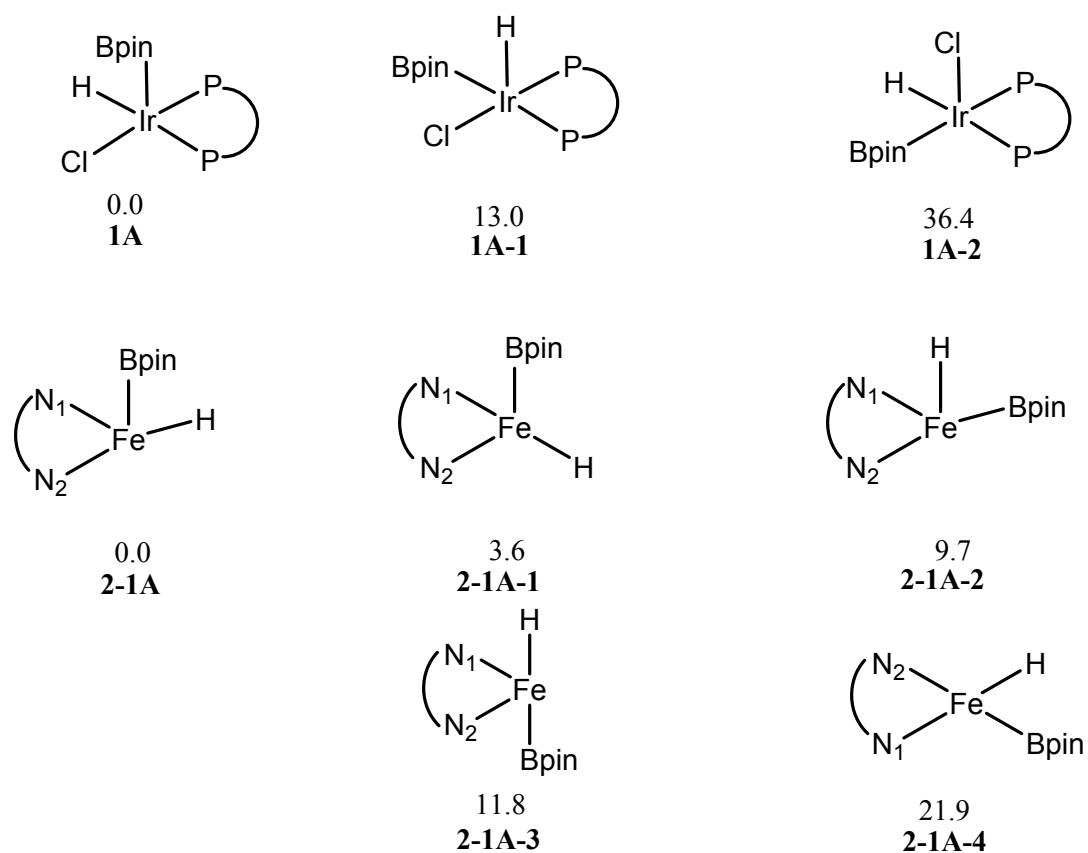

**Fig. S1** Other possible isomers of **1A** and **2-1A**. Values shown are relative free energies in kcal/mol.

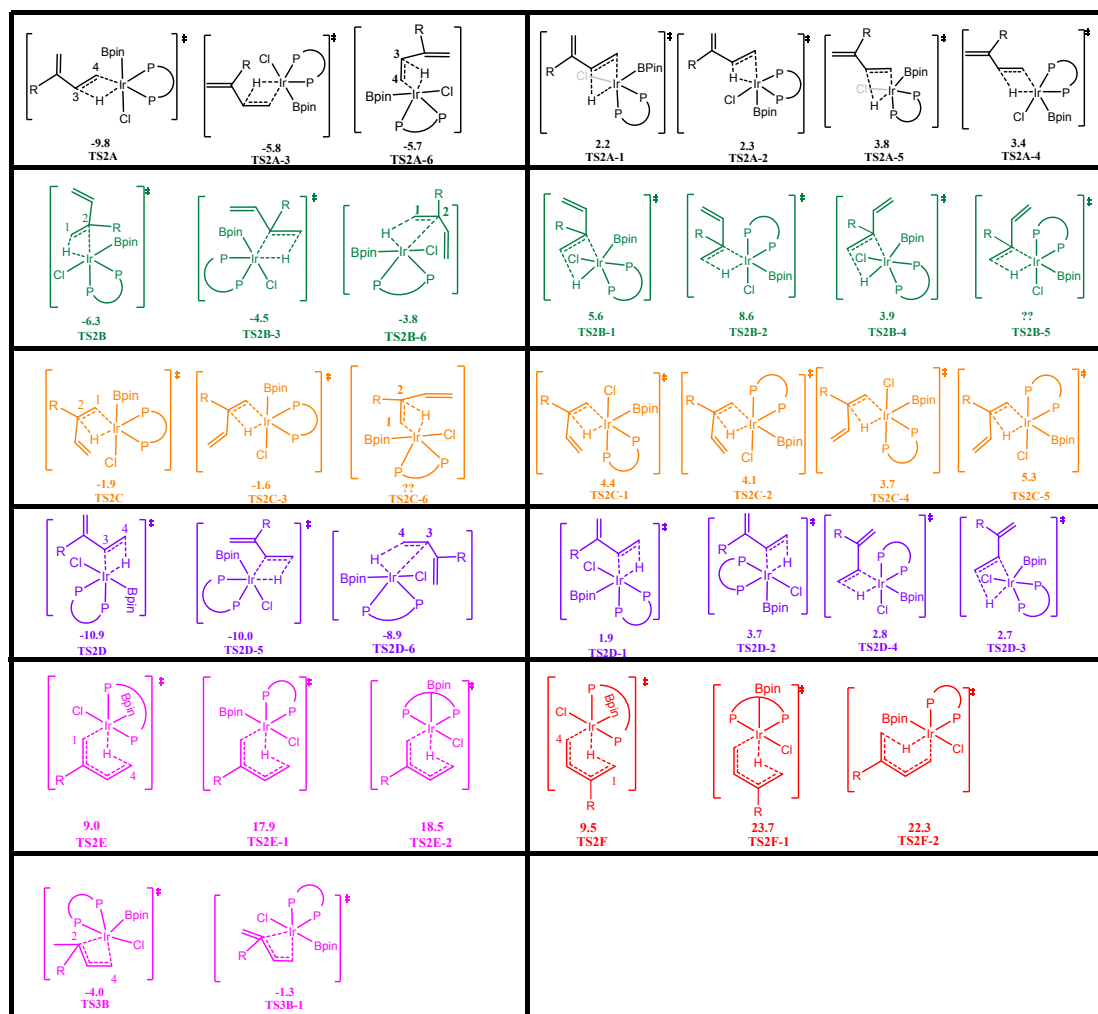

**Fig. S2** Other possible isomers of key species labeled in Fig. 1. Values shown are relative free energies in kcal/mol.

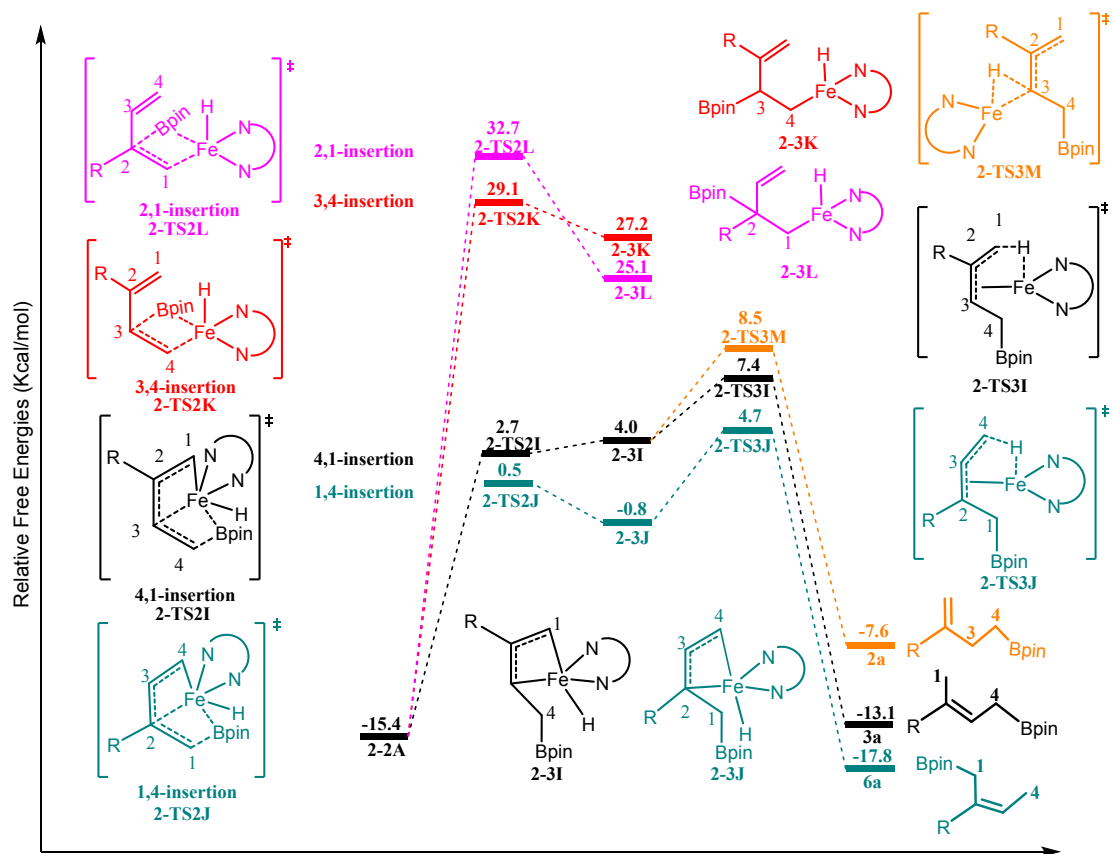

**Fig. S3** Calculated energy profiles for iron-catalyzed hydroboration of 2-substituted 1,3-dienes (boryl group migration precedes hydrogen migration). Values shown are relative free energies in kcal/mol.

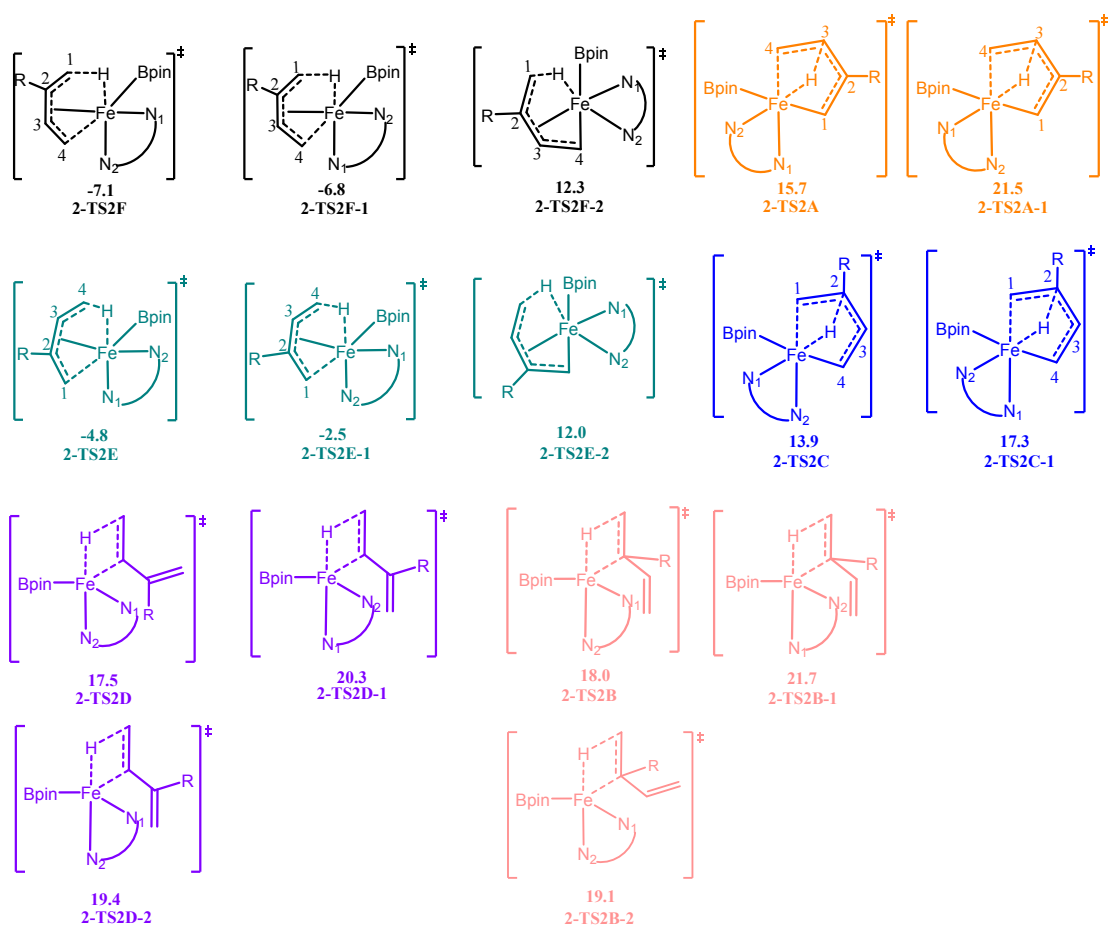

**Fig. S4** Other possible isomers of key species labeled in Fig. 5. Values shown are relative free energies in kcal/mol.

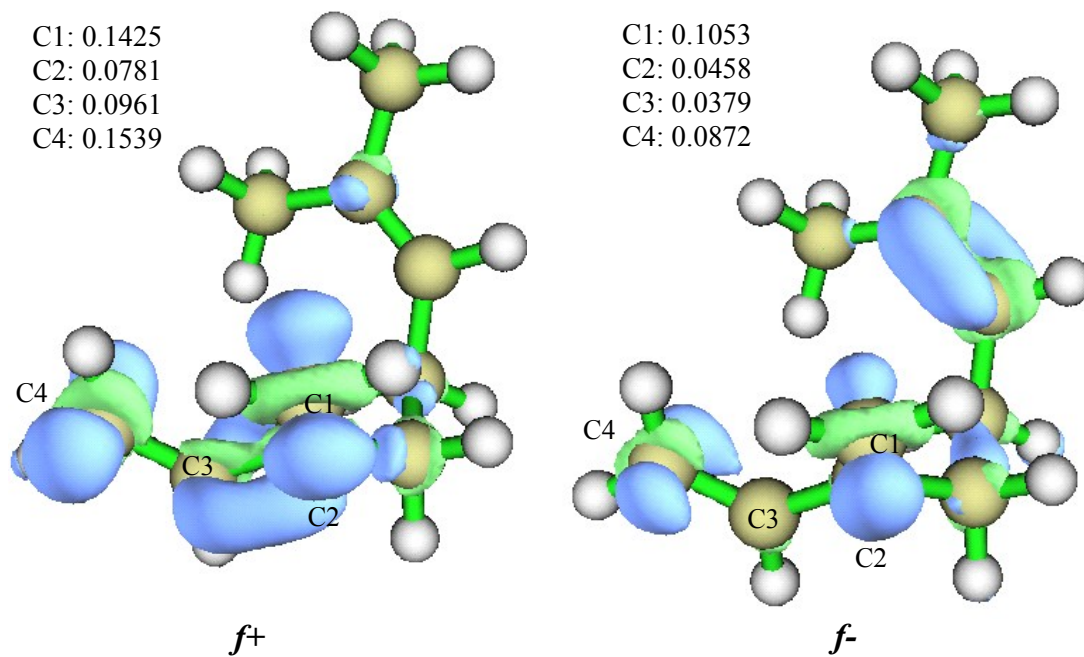

**Fig. S5** The 3D representation Fukui function of **1a**.

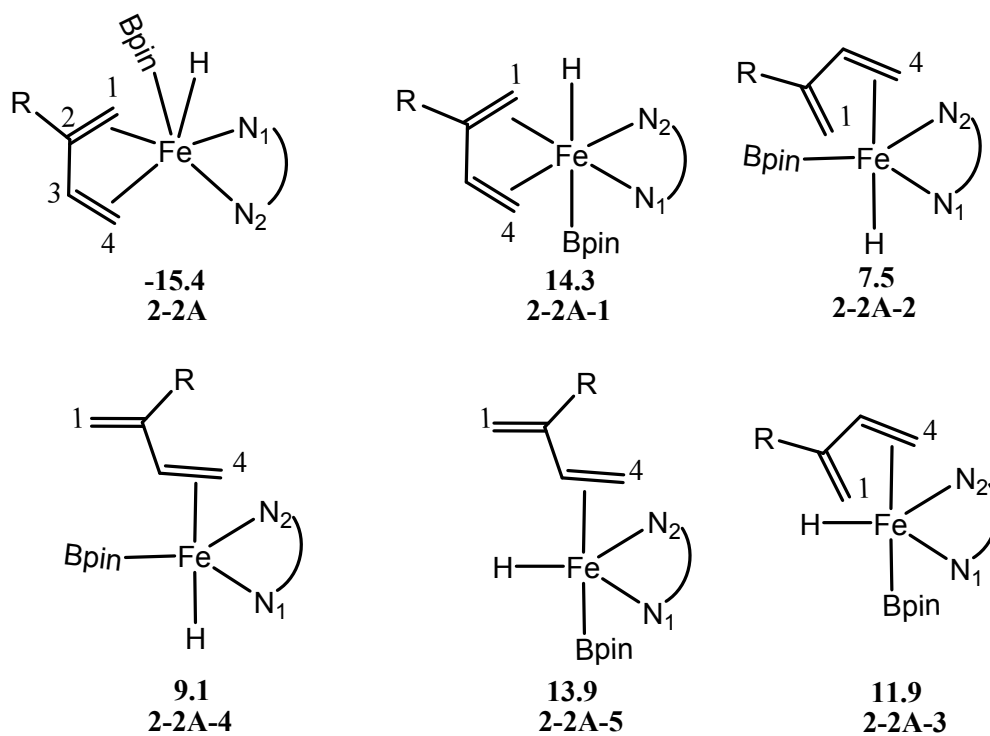

**Fig. S6** Other possible isomers of **2-2A**. Values shown are relative free energies in kcal/mol.

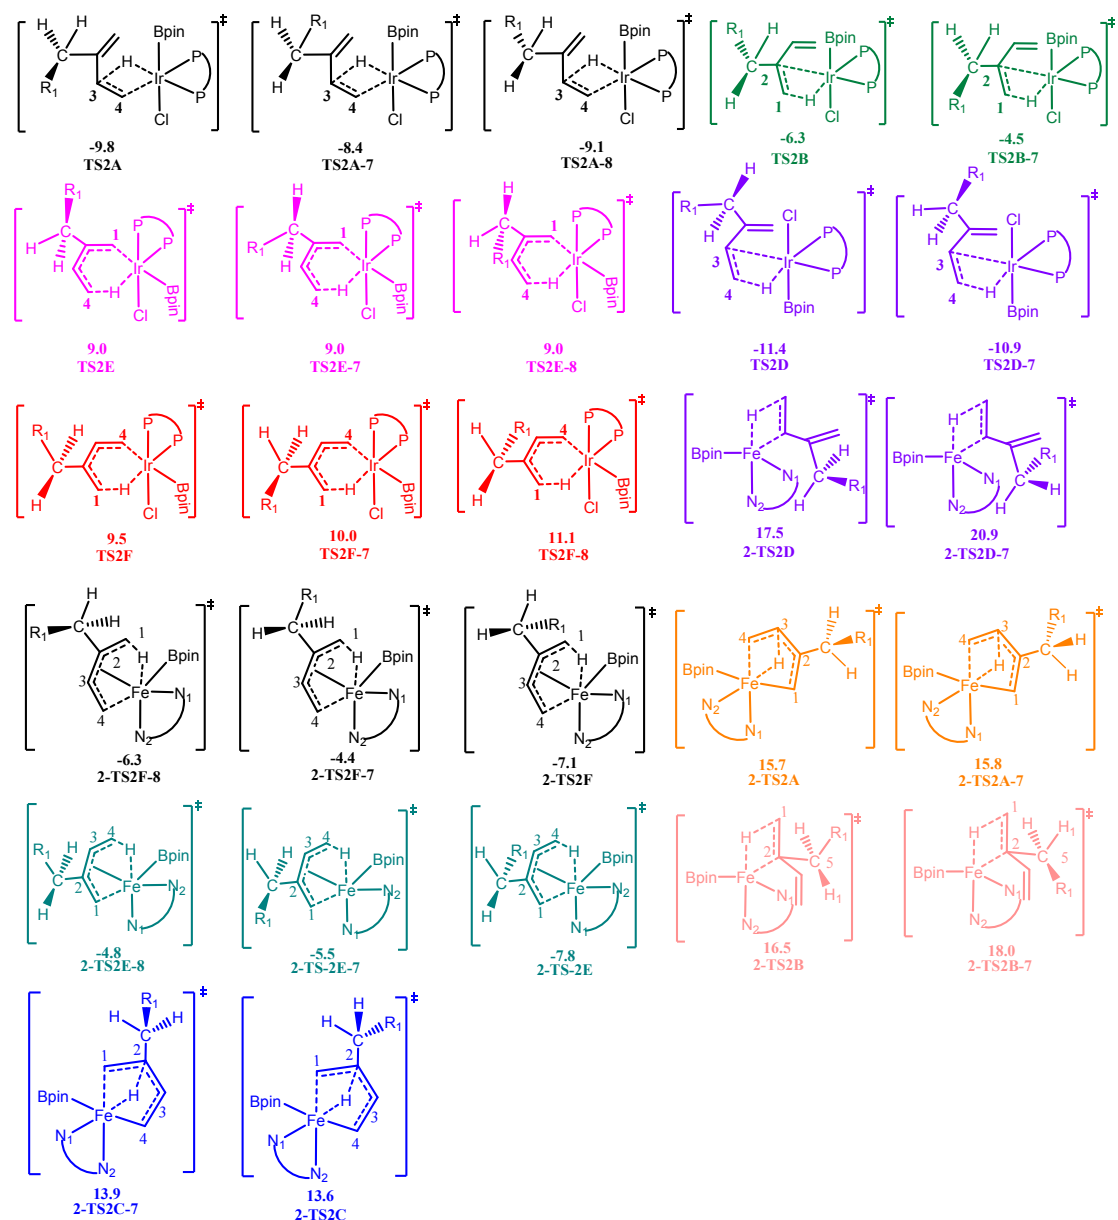

**Fig. S7** Other possible conformers of key species labeled in Fig. 1 and Fig. 5. Values shown are relative free energies in kcal/mol.

## Section 2. Table of energy values.

**Table S1.** Energies (in Hartree) of All TS and Intermediates.

| Geometry | $E_0$        | $E$          | $H_{298.15}$ | $G_{298.15}$ | $E_{(sol,M06)}$ |
|----------|--------------|--------------|--------------|--------------|-----------------|
| 1a       | -390.412480  | -390.400430  | -390.400430  | -390.450953  | -390.2383936    |
| TS2A     | -3054.623701 | -3054.572337 | -3054.571399 | -3054.713372 | -3053.836983    |
| TS2B     | -3054.612420 | -3054.560897 | -3054.559959 | -3054.701136 | -3053.831454    |
| TS2C     | -3054.612146 | -3054.560848 | -3054.559910 | -3054.699129 | -3053.824453    |

|       |              |              |              |              |               |
|-------|--------------|--------------|--------------|--------------|---------------|
| TS2D  | -3054.622855 | -3054.571423 | -3054.570485 | -3054.711177 | -3053.839468  |
| TS2E  | -3054.589106 | -3054.537917 | -3054.536979 | -3054.677634 | -3053.806948  |
| TS2F  | -3054.589125 | -3054.537903 | -3054.536965 | -3054.677775 | -3053.806191  |
| TS3A  | -3054.631216 | -3054.580413 | -3054.579475 | -3054.720698 | -3053.839268  |
| TS3B  | -3054.608081 | -3054.557094 | -3054.556156 | -3054.693309 | -3053.827723  |
| TS3C  | -3054.624226 | -3054.573308 | -3054.572370 | -3054.713595 | -3053.835378  |
| TS3D  | -3054.614842 | -3054.563973 | -3054.563035 | -3054.701415 | -3053.833102  |
| TS4B  | -3054.641825 | -3054.589994 | -3054.589056 | -3054.733474 | -3053.848305  |
| TS4D  | -3054.633124 | -3054.581132 | -3054.580194 | -3054.725525 | -3053.849418  |
| TS3H  | -3054.602921 | -3054.551914 | -3054.550976 | -3054.689235 | -3053.815016  |
| TS3G  | -3054.593967 | -3054.542735 | -3054.541797 | -3054.680556 | -3053.81228   |
| 2A    | -3054.631288 | -3054.579813 | -3054.578875 | -3054.719385 | -3053.839819  |
| 3A    | -3054.645482 | -3054.594472 | -3054.593534 | -3054.734328 | -3053.843348  |
| 2B    | -3054.624345 | -3054.572645 | -3054.571707 | -3054.712069 | -3053.837215  |
| 3C    | -3054.647726 | -3054.596258 | -3054.595320 | -3054.738363 | --3053.853902 |
| 5a-Ir | -3054.655827 | -3054.603025 | -3054.602087 | -3054.753732 | -3053.837729  |
| 3D    | -3054.627779 | -3054.576164 | -3054.575227 | -3054.715612 | -3053.842861  |
| 4D    | -3054.648874 | -3054.596946 | -3054.596008 | -3054.738169 | -3053.858734  |
| 5D    | -3054.665675 | -3054.614341 | -3054.613403 | -3054.754833 | -3053.865868  |
| 6a-Ir | -3054.662174 | -3054.610736 | -3054.609798 | -3054.757887 | -3053.84947   |
| 6D    | -3054.656779 | -3054.606031 | -3054.605093 | -3054.743961 | -3053.863246  |
| 3B    | -3054.616707 | -3054.565161 | -3054.564223 | -3054.704144 | -3053.833264  |
| 4B    | -3054.632822 | -3054.580970 | -3054.580032 | -3054.723040 | -3053.852273  |
| 5B    | -3054.759056 | -3054.614918 | -3054.615855 | -3054.667940 | -3053.868022  |
| 6B    | -3054.664015 | -3054.612166 | -3054.611229 | -3054.753255 | -3053.863387  |
| 3E    | -3054.640922 | -3054.583575 | -3054.582583 | -3054.737669 | -3053.850929  |
| 3F    | -3054.648020 | -3054.596416 | -3054.595478 | -3054.737089 | -3053.847749  |
| 4a-Ir | -3054.649468 | -3054.597562 | -3054.596624 | -3054.743575 | -3053.845158  |
| 3a-Ir | -3054.663089 | -3054.610551 | -3054.609613 | -3054.758217 | -3053.851481  |
| 2a-Ir | -3054.664930 | -3054.613317 | -3054.612380 | -3054.756832 | -3053.871353  |
| 7a-Ir | -3054.656765 | -3054.603944 | -3054.603006 | -3054.754757 | -3053.845083  |
| 1A    | -2664.235079 | -2664.196136 | -2664.195198 | -2664.309012 | -2663.613132  |
| TS2I  | -3054.618598 | -3054.567979 | -3054.567041 | -3054.706307 | -3053.828978  |
| TS2J  | -3054.607204 | -3054.556240 | -3054.555303 | -3054.694751 | -3053.822934  |
| TS2K  | -3054.593352 | -3054.542805 | -3054.541867 | -3054.679736 | -3053.80872   |
| TS2L  | -3054.592449 | -3054.541284 | -3054.540347 | -3054.681548 | -3053.805927  |
| TS2M  | -3054.565621 | -3054.514240 | -3054.513302 | -3054.656925 | -3053.775593  |
| TS2N  | -3054.551121 | -3054.500166 | -3054.499228 | -3054.637387 | -3053.770315  |
| 3I    | -3054.634135 | -3054.582934 | -3054.581996 | -3054.723648 | -3053.838000  |
| 3J    | -3054.626165 | -3054.575561 | -3054.574623 | -3054.714660 | -3053.832186  |
| 3K    | -3054.645436 | -3054.593839 | -3054.592901 | -3054.737029 | -3053.838258  |
| 3L    | -3054.626109 | -3054.574848 | -3054.574848 | -3054.715386 | -3053.827716  |



|        |              |              |              |              |              |
|--------|--------------|--------------|--------------|--------------|--------------|
| 3M     | -3054.658083 | -3054.606792 | -3054.605854 | -3054.750767 | -3053.851227 |
| 3N     | -3054.667258 | -3054.616752 | -3054.615814 | -3054.755888 | -3053.867316 |
| Cat-Ir | -2252.519992 | -2252.491986 | -2252.491048 | -2252.582470 | -2252.016358 |
| 2-2A   | -1925.572370 | -1925.524116 | -1925.523178 | -1925.659348 | -1924.845621 |
| 2-TS2F | -1925.553229 | -1925.505086 | -1925.504148 | -1925.642370 | -1924.832331 |
| 2-TS2E | -1925.552493 | -1925.504542 | -1925.503604 | -1925.640618 | -1924.834712 |
| 2-TS2D | -1925.529950 | -1925.481258 | -1925.480320 | -1925.618846 | -1924.79315  |
| 2-TS2C | -1925.520926 | -1925.473481 | -1925.472543 | -1925.607627 | -1924.799294 |
| 2-TS2B | -1925.531255 | -1925.483304 | -1925.483304 | -1925.617725 | -1924.794653 |
| 2-TS2A | -1925.522475 | -1925.475035 | -1925.474097 | -1925.608402 | -1924.796002 |
| 2-3F   | -1925.569379 | -1925.520944 | -1925.520006 | -1925.655049 | -1924.834225 |
| 2-3E   | -1925.570481 | -1925.522591 | -1925.521653 | -1925.659751 | -1924.836841 |
| 2-3D   | -1925.559046 | -1925.510424 | -1925.509486 | -1925.647242 | -1924.824965 |
| 2-3C   | -1925.532401 | -1925.484338 | -1925.483400 | -1925.620132 | -1924.794746 |
| 2-3B   | -1925.558279 | -1925.510007 | -1925.509069 | -1925.644277 | -1924.824788 |
| 2-3A   | 1925.537087  | -1925.488036 | -1925.487099 | -1925.626964 | -1924.796582 |
| 2-TS3F | -1925.556825 | -1925.508743 | -1925.507805 | -1925.643637 | -1924.818113 |
| 2-TS3E | -1925.544867 | -1925.497170 | -1925.496233 | -1925.629252 | -1924.810113 |
| 2-TS3A | -1925.519823 | -1925.471137 | -1925.470200 | -1925.609708 | -1924.775571 |
| 2-TS3G | -1925.514660 | -1925.466203 | -1925.465266 | -1925.602737 | -1924.778999 |
| 2-TS3H | -1925.503408 | -1925.455148 | -1925.454210 | -1925.589443 | -1924.773496 |
| 3a-Fe  | -2316.015103 | -2315.952748 | -2315.951810 | -2316.133569 | -2315.079565 |
| 4a-Fe  | -2316.000106 | -2315.938811 | -2315.937873 | -2316.111355 | -2315.064382 |
| 6a-Fe  | -2316.017155 | -2315.953753 | -2315.952815 | -2316.139637 | -2315.087045 |
| 7a-Fe  | -2316.008406 | -2315.948122 | -2315.947184 | -2316.119634 | -2315.072347 |
| 2a-Fe  | -2316.011040 | -2315.952247 | -2315.951309 | -2316.123795 | -2315.070831 |
| 1A-1   | -2664.222033 | -2664.182965 | -2664.182028 | -2664.297486 | -2663.592464 |
| 1A-2   | -2664.179036 | -2664.135782 | -2664.134790 | -2664.259918 | -2663.555102 |
| 2-1A   | -1535.101218 | -1535.064893 | -1535.063955 | -1535.174535 | -1534.521886 |
| 2-1A-1 | -1535.091639 | -1535.055428 | -1535.054490 | -1535.054490 | -1534.516118 |
| 2-1A-2 | -1535.088477 | -1535.052104 | -1535.051166 | -1535.161035 | -1534.50638  |
| 2-1A-3 | -1535.083003 | -1535.046522 | -1535.045584 | -1535.156966 | -1534.502916 |
| 2-1A-4 | -1535.075218 | -1535.039587 | -1535.038649 | -1535.147080 | -1534.486945 |
| TS2B-4 | -3054.595961 | -3054.544473 | -3054.543535 | -3054.685421 | -3053.815125 |
| TS2C-1 | -3054.599708 | -3054.547910 | -3054.546973 | -3054.689190 | -3053.814361 |
| TS2C-2 | -3054.601202 | -3054.549743 | -3054.548805 | -3054.689239 | -3053.814767 |
| TS2C-3 | -3054.612859 | -3054.561797 | -3054.560859 | -3054.699208 | -3053.823928 |
| TS2C-4 | -3054.603594 | -3054.552046 | -3054.551109 | -3054.691427 | -3053.815483 |
| TS2C-5 | -3054.601103 | -3054.549946 | -3054.549008 | -3054.687938 | -3053.812871 |
| TS2D-1 | -3054.606294 | -3054.555661 | -3054.554723 | -3054.693428 | -3053.818329 |
| TS2D-2 | -3054.600166 | -3054.549162 | -3054.548224 | -3054.687085 | -3053.815829 |
| TS2D-3 | -3054.606453 | -3054.555381 | -3054.554443 | -3054.694197 | -3053.816985 |
| TS2D-4 | -3054.607389 | -3054.555926 | -3054.554988 | -3054.696055 | -3053.816884 |

|          |              |              |              |              |              |
|----------|--------------|--------------|--------------|--------------|--------------|
| TS2D-5   | -3054.622410 | -3054.571225 | -3054.570288 | -3054.710956 | -3053.837285 |
| TS2E-1   | -3054.589787 | -3054.538642 | -3054.537704 | -3054.677554 | -3053.792773 |
| TS-2E-2  | -3054.585621 | -3054.534135 | -3054.533197 | -3054.674689 | -3053.791923 |
| TS-2F-1  | -3054.582117 | -3054.530588 | -3054.529650 | -3054.671872 | -3053.78358  |
| 2-TS2J   | -1925.553367 | -1925.506111 | -1925.505173 | -1925.636169 | -1924.820267 |
| 2-TS2I   | -1925.558072 | -1925.510470 | -1925.510470 | -1925.643618 | -1924.816845 |
| 2-TS2K   | -1925.430365 | -1925.388161 | -1925.387223 | -1925.505807 | -1924.774713 |
| 2-TS2L   | -1925.514269 | -1925.466084 | -1925.465146 | -1925.600856 | -1924.76898  |
| 2-3I     | -1925.562244 | -1925.513920 | -1925.507341 | -1925.597966 | -1924.81455  |
| 2-3J     | -1925.566159 | -1925.517942 | -1925.517004 | -1925.652551 | -1924.822322 |
| 2-3K     | -1925.530733 | -1925.482126 | -1925.481188 | -1925.620280 | -1924.777779 |
| 2-3L     | -1925.533199 | -1925.484351 | -1925.483413 | -1925.622711 | -1924.781101 |
| 2-TS3I   | -1925.546710 | -1925.498630 | -1925.497692 | -1925.634197 | -1924.809297 |
| 2-TS3J   | -1925.552300 | -1925.504373 | -1925.503436 | -1925.638396 | -1924.813617 |
| 2-TS3M   | -1925.548877 | -1925.500898 | -1925.499961 | -1925.636119 | -1924.807536 |
| HBpin-Fe | -411.679864  | -411.670466  | -411.669528  | -411.712675  | -411.5623539 |
| HBpin-Ir | -411.679864  | -411.670466  | -411.669528  | -411.712675  | -411.5619787 |
| Fe(1a)   | -1513.875601 | -1513.837591 | -1513.836654 | -1513.952151 | -1513.258715 |
| TS1      | -2664.205512 | -2664.167371 | -2664.166433 | -2664.278536 | -2663.582401 |
| Pre1     | -2664.206615 | -2664.167353 | -2664.166415 | -2664.283322 | -2663.583492 |
| TS2B-3   | -3054.613103 | -3054.562112 | -3054.561175 | -3054.698324 | -3053.828534 |
| TS2A-1   | -3054.606143 | -3054.554932 | -3054.553994 | -3054.693858 | -3053.81793  |
| TS2A-2   | -3054.606199 | -3054.555139 | -3054.554201 | -3054.693428 | -3053.817704 |
| TS2A-3   | -3054.622755 | -3054.571364 | -3054.570426 | -3054.711979 | -3053.830612 |
| TS2A-4   | -3054.606551 | -3054.555446 | -3054.554508 | -3054.693797 | -3054.606551 |
| TS2A-5   | -3054.606561 | -3054.555370 | -3054.554432 | -3054.694977 | -3053.815957 |
| TS3B-1   | -3054.604298 | -3054.552929 | -3054.551991 | -3054.691649 | -3053.823379 |
| TS2F-1   | -3054.585626 | -3054.534328 | -3054.533391 | -3054.674362 | -3053.785816 |
| TS2B-1   | -3054.595819 | -3054.544509 | -3054.543571 | -3054.682847 | -3053.812455 |
| TS2B-2   | -3054.594058 | -3054.542675 | -3054.541737 | -3054.680983 | -3053.807715 |
| 2-TS2E-1 | -1925.548164 | -1925.500344 | -1925.499406 | -1925.633096 | -1924.825045 |
| 2-TS2E-2 | -1925.523529 | -1925.475402 | -1925.474464 | -1925.608516 | -1924.802012 |
| 2-TS2F-1 | -1925.499388 | -1925.452663 | -1925.451726 | -1925.583455 | -1924.831934 |
| 2-TS2F-2 | -1925.507627 | -1925.460876 | -1925.459939 | -1925.590115 | -1924.801421 |
| 2-TS2D-1 | -1925.533933 | -1925.486950 | -1925.486012 | -1925.618946 | -1924.788707 |
| 2-TS2C-1 | -1925.522106 | -1925.475750 | -1925.474812 | -1925.604639 | -1924.793481 |
| 2-TS2B-1 | -1925.527382 | -1925.479466 | -1925.478528 | -1925.612472 | -1924.786435 |
| 2-TS2A-1 | -1925.522974 | -1925.474226 | -1925.473288 | -1925.611691 | -1924.786831 |
| 2-2A-1   | -1925.522694 | -1925.475238 | -1925.474300 | -1925.606843 | -1924.798216 |
| 2-2A-2   | -1925.540403 | -1925.491422 | -1925.490485 | -1925.632070 | -1924.809127 |
| 2-2A-3   | -1925.538156 | -1925.538156 | -1925.488901 | -1925.627705 | -1924.80205  |
| 2-2A-4   | -1925.537974 | -1925.489302 | -1925.488364 | -1925.625593 | -1924.806588 |
| 2-2A-5   | -1925.536582 | -1925.489230 | -1925.488293 | -1925.621608 | -1924.798981 |

|          |              |              |              |              |              |
|----------|--------------|--------------|--------------|--------------|--------------|
| TS2A-6   | -3054.621757 | -3054.571059 | -3054.570121 | -3054.709994 | -3053.830399 |
| TS2B-6   | -3054.573314 | -3054.523329 | -3054.522391 | -3054.659085 | -3053.827349 |
| TS2D-6   | -3054.619119 | -3054.567676 | -3054.566738 | -3054.708629 | -3053.835617 |
| 2-TS2B-2 | -1925.528871 | -1925.480861 | -1925.479924 | -1925.614453 | -1924.790482 |
| 2-TS2D-2 | -1925.530792 | -1925.483143 | -1925.482205 | -1925.615985 | -1924.790167 |
| TS2D-7   | -3054.622522 | -3054.571212 | -3054.570274 | -3054.710384 | -3053.838665 |
| TS2A-7   | -3054.626139 | -3054.575538 | -3054.574601 | -3054.714171 | -3053.834726 |
| TS2A-8   | -3054.625858 | -3054.575168 | -3054.574230 | -3054.574230 | -3053.83593  |
| TS2B-7   | -3054.607786 | -3054.556393 | -3054.555455 | -3054.695199 | -3053.82861  |
| TS2E-7   | -3054.588376 | -3054.537321 | -3054.536384 | -3054.675788 | -3053.807035 |
| TS2E-8   | -3054.588375 | -3054.537319 | -3054.536382 | -3054.675806 | -3053.807053 |
| TS2F-7   | -3054.588308 | -3054.537360 | -3054.537360 | -3054.675217 | -3053.80546  |
| TS2F-8   | -3054.589122 | -3054.537901 | -3054.536964 | -3054.677753 | -3053.803636 |
| 2-TS2F-7 | -1925.548814 | -1925.500824 | -1925.499886 | -1925.635064 | -1924.828125 |
| 2-TS2F-8 | -1925.547665 | -1925.499643 | -1925.498705 | -1925.634989 | -1924.831134 |
| 2-TS2E-7 | -1925.548992 | -1925.500862 | -1925.499924 | -1925.638259 | -1924.829937 |
| 2-TS2E-8 | -1925.554475 | -1925.507435 | -1925.506497 | -1925.639100 | -1924.828784 |
| 2-TS2D-7 | -1925.530267 | -1925.484057 | -1925.483119 | -1925.613305 | -1924.787749 |
| 2-TS2C-7 | -1925.523427 | -1925.475269 | -1925.474331 | -1925.611236 | -1924.798943 |
| 2-TS2B-7 | -1925.531306 | -1925.484250 | -1925.483312 | -1925.615038 | -1924.79228  |
| 2-TS2A-7 | -1925.522470 | -1925.475035 | -1925.474097 | -1925.608302 | -1924.795901 |

$E_0$  = Sum of electronic and zero-point energies calculated by B3LYP in solvent

$E$  = Sum of electronic and thermal energies calculated by B3LYP in solvent

$H_{298.15}$  = Sum of electronic and thermal enthalpies calculated by B3LYP in solvent

$G_{298.15}$  = Sum of electronic and thermal free energies calculated by B3LYP in solvent

$E_{(M06)}$  = Single point energies calculated by M06 in solvent

### Section 3. Calculated imaginary frequencies of all transition states species.

| Species | Frequency |
|---------|-----------|
| TS1     | -23.71    |
| TS2A    | -625.18   |
| TS3A    | -238.60   |
| TS2B    | -685.07   |
| TS3B    | -157.70   |

|        |          |
|--------|----------|
| TS4B   | -288.38  |
| TS2C   | -612.29  |
| TS3C   | -249.30  |
| TS2D   | -652.73  |
| TS3D   | -161.19  |
| TS4D   | -241.10  |
| TS2E   | -823.80  |
| TS2F   | -837.81  |
| TS3G   | -119.40  |
| TS3H   | -272.70  |
| TS2I   | -108.08  |
| TS2J   | -109.75  |
| TS2K   | -188.12  |
| TS2L   | -191.38  |
| TS2M   | -310.06  |
| TS2N   | -493.08  |
| 2-TS2A | -743.37  |
| 2-TS2B | -882.39  |
| 2-TS2C | -522.51  |
| 2-TS2D | -881.92  |
| 2-TS2E | -1028.52 |
| 2-TS2F | -965.50  |
| 2-TS3A | -121.92  |
| 2-TS3E | -43.20   |
| 2-TS3F | -50.57   |
| 2-TS3G | -109.46  |
| 2-TS3H | -62.15   |
| TS2A-1 | -549.48  |
| TS2A-2 | -624.22  |
| TS2A-3 | -721.57  |
| TS3B-1 | -156.15  |
| TS2B-3 | -727.15  |
| TS2B-4 | -599.27  |
| TS2C-1 | -508.11  |
| TS2C-2 | -518.06  |
| TS2C-3 | -651.30  |
| TS2C-4 | -545.27  |
| TS2C-5 | -373.18  |
| TS2D-1 | -691.17  |
| TS2D-2 | -558.76  |
| TS2D-3 | -665.41  |
| TS2D-4 | -502.59  |
| TS2D-5 | -637.78  |

|          |          |
|----------|----------|
| TS2E-1   | -805.51  |
| TS2E-2   | -517.60  |
| TS2F-1   | -518.18  |
| TS2F-2   | -867.02  |
| 2-TS2I   | -42.31   |
| 2-TS2J   | -95.91   |
| 2-TS2K   | -72.61   |
| 2-TS2L   | -129.37  |
| 2-TS3H   | -843.96  |
| 2-TS3I   | -866.27  |
| 2-TS3M   | -814.63  |
| TS2A-4   | -679.46  |
| TS2A-5   | -645.21  |
| TS2B-1   | -661.32  |
| TS2B-2   | -107.30  |
| 2-TS2E-1 | -935.01  |
| 2-TS2E-2 | -627.64  |
| 2-TS2F-1 | -1007.33 |
| 2-TS2F-2 | -124.66  |
| 2-TS2A-1 | -696.17  |
| 2-TS2B-1 | -868.38  |
| 2-TS2C-1 | -544.95  |
| 2-TS2D-1 | -873.34  |
| TS2A-6   | -597.01  |
| TS2B-6   | -648.51  |
| TS2D-6   | -736.44  |
| 2-TS2B-2 | -909.71  |
| 2-TS2D-2 | -866.25  |
| TS2D-7   | -702.18  |
| TS2A-7   | -636.49  |
| TS2A-8   | -657.08  |
| TS2E-7   | -835.38  |
| TS2E-8   | -835.24  |
| TS2F-7   | -803.24  |
| TS2F-8   | -837.61  |
| 2-TS2F-7 | -999.86  |
| 2-TS2F-8 | -968.86  |
| 2-TS2E-7 | -1024.40 |
| 2-TS2E-8 | -1019.60 |
| 2-TS2D-7 | -897.93  |
| 2-TS2C-7 | -531.38  |
| 2-TS2B-7 | -881.19  |
| 2-TS2A-7 | -743.37  |
